# Supplementary material
Source: publisher site journal article supplement (https://www.spandidos-publications.com/8585/downloadSupplementary)
Supplement: Supplementary file 1 [file downloadSupplementary]

Table SI. Common targets between zedoary turmeric oil and non-small cell lung cancer.

| Gene name |
|-----------|
| EGFR      |
| PIK3CA    |
| TERT      |
| CDK4      |
| PTPN11    |
| MAP2K1    |
| IL6       |
| JAK3      |
| TNF       |
| MAPK1     |
| ESR1      |
| AR        |
| FGFR1     |
| MDM2      |
| PPARG     |
| CREBBP    |
| HIF1A     |
| PTGS2     |
| ABCB1     |
| CDK2      |
| IGF1R     |
| FLT1      |
| JAK2      |
| MMP1      |
| BCL2L1    |
| MAPK8     |
| PARP1     |
| TYMS      |

CDK6

MAPK14

CDK1

MAPK3

PDGFRB

SHH

NOS2

HMOX1

ESR2

PRKCA

PIK3CD

PRKDC

CHEK1

IKBKB

PRKCD

GSK3B

VDR

PGR

JAK1

CYP17A1

HDAC1

GLI1

MPO

NOS3

PIK3CB

CYP19A1

ACE

NLRP3

PTK2B

MIF

CCR5

CYP3A4

LCK

PTPN1

CDC25A

G6PD

NR3C1

CTSB

MME

EPAS1

SCN9A

EPHX1

CA9

ALOX5

IL6ST

PDCD4

CTSD

F2

TLR9

DPP4

ITK

CXCR3

PRKCB

CDC25B

PLA2G2A

APP

TYK2

SRD5A2

PTGS1

IDO1

GLI2

CDC7

ADORA2A

DRD2

OPRM1

PREP

PIN1

PIM1

---
